# Supplementary material
Source: PubMed Central journal article supplement (PMC6643662)
Supplement: ao7b00010_si_001.pdf [file ao7b00010_si_001.pdf]

# Ligand selectivity between ADP-ribosylating toxins. An inverse docking study for multi-target drug discovery.

Patricia Saenz-Méndez<sup>1,2</sup>, Martin Eriksson<sup>1</sup> and Leif A. Eriksson<sup>1\*</sup>

<sup>1</sup>*Department of Chemistry and Molecular Biology, University of Gothenburg, 405 30 Göteborg, Sweden*

<sup>2</sup>*Computational Chemistry and Biology Group, Facultad de Química, Universidad de la República, 11800 Montevideo, Uruguay*

\*corresponding author: leif.eriksson@chem.gu.se

## Table of Contents

|                                                                                                                                                                                                                                                     | Page |
|-----------------------------------------------------------------------------------------------------------------------------------------------------------------------------------------------------------------------------------------------------|------|
| <b>Table S1.</b> Known ligands selected to optimize the docking box size and crystal structures used as references                                                                                                                                  | S2   |
| <b>Figure S1.</b> Structures of the ligands selected for benchmarking docking against toxins                                                                                                                                                        | S3   |
| <b>Figure S2.</b> ETA represented with ribbons, including the molecular surface for the protein. (A) Selected spheres corresponding to an 8Å box are represented in magenta. (B) Selected spheres corresponding to a 6Å box are represented in blue | S4   |
| <b>Figure S3.</b> Ligand interactions between CT and NAD <sup>+</sup> . (A) Crystal structure (3Q9O). (B) Docking results using 2Q6M as target. This 2D representation was prepared using MOE 2015.10.                                              | S4   |
| <b>Table S2.</b> RMSD values of the heavy atoms for each ligand with respect to the crystal structure, when employing both an 8 Å sphere selecting radius and a 6 Å radius                                                                          | S5   |

**Table S1: Known ligands selected to optimize the docking box size and crystal structures used as references**

| <b>Toxin</b> | <b>PDB id</b> | <b>Ligand</b>     |
|--------------|---------------|-------------------|
| ETA          | 1AER          | $\beta$ -TAD      |
| ETA          | 1XK9          | PJ34              |
| DT           | 1DTP          | APU               |
| CT           | 3Q90          | NAD <sup>+</sup>  |
| CT           | 3ESS          | 1,8-naphthalimide |
| CT           | 3NY6          | V30               |
| CT           | 3KI0          | GPD               |
| CT           | 3KI1          | GPF               |
| CT           | 3KI2          | GPG               |
| CT           | 3KI3          | GPH               |
| CT           | 3KI4          | GPP               |
| CT           | 3KI5          | GPM               |
| CT           | 3KI6          | GPL               |
| CT           | 3KI7          | GPI               |

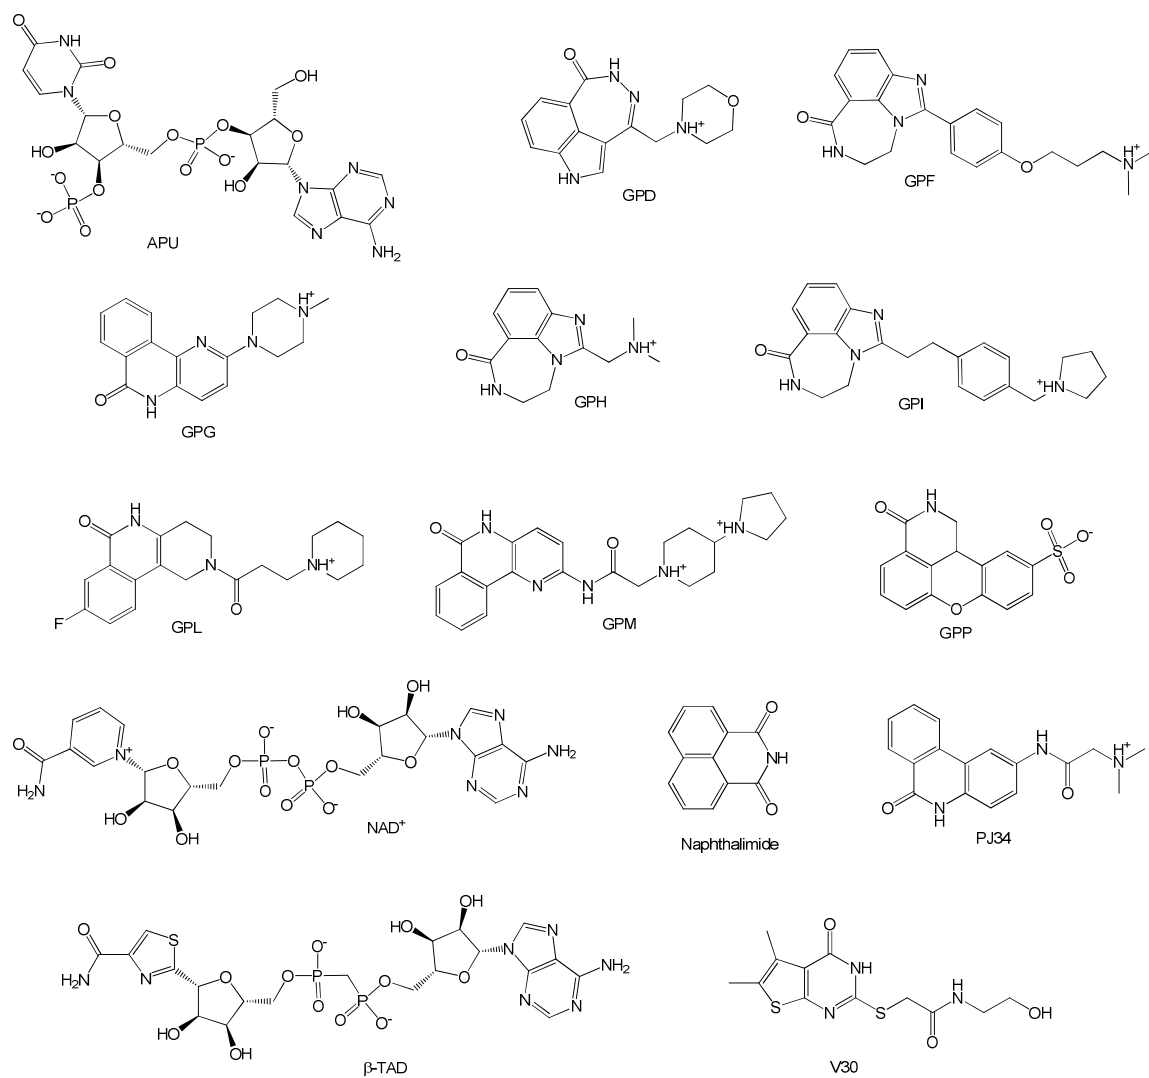

**Figure S1. Structures of the ligands selected for benchmarking docking against toxins**

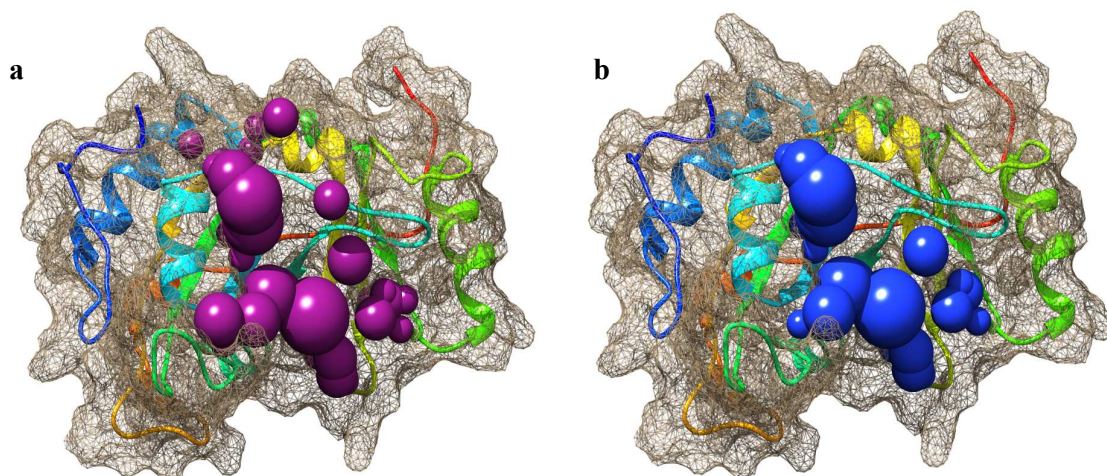

**Figure S2.** ETA represented with ribbons, including the molecular surface of the protein. (a) Selected spheres corresponding to an 8 Å box are represented in magenta. (b) Selected spheres corresponding to a 6 Å box are represented in blue.

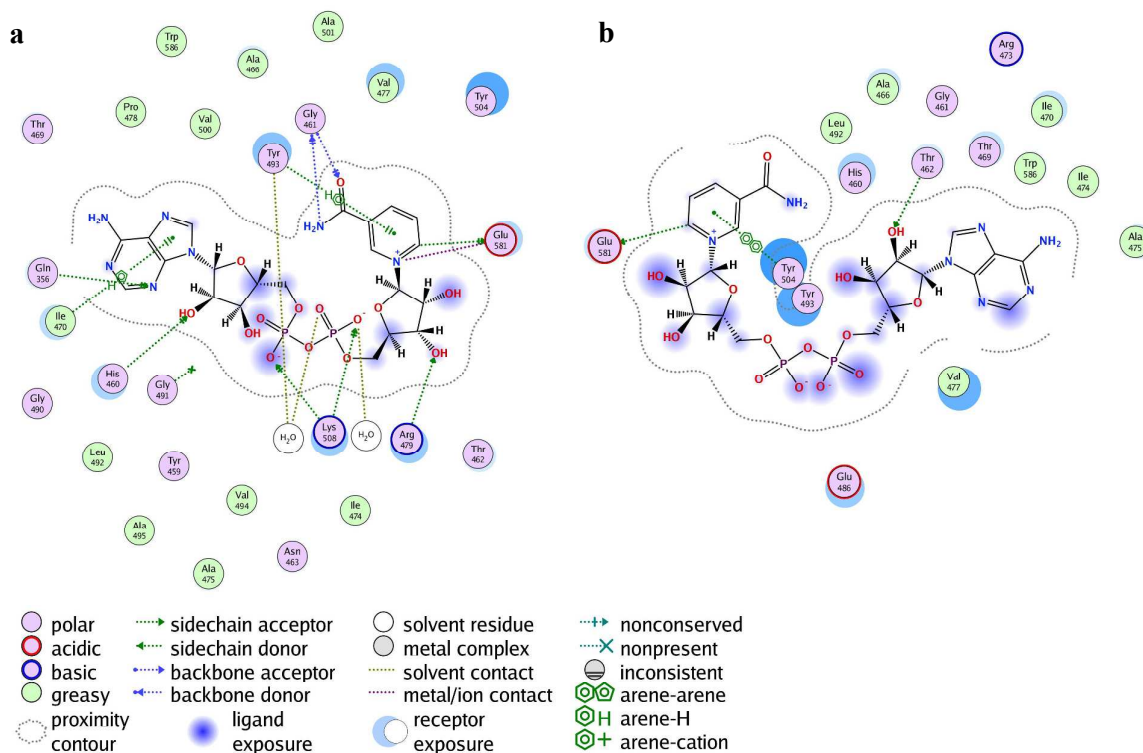

**Figure S3.** Ligand interactions between CT and NAD<sup>+</sup>. (a) Crystal structure (3Q9O[1]). (b) Docking results using 2Q6M [2] as target. The 2D representations were prepared using MOE 2015.10 [3].

**Table S2: RMSD values of the heavy atoms for each docked ligand with respect to the crystal structure, when employing an 8 Å or a 6 Å sphere selecting radius.**

| PDB id (reference crystal structure) | Ligand            | RMSD values |      |
|--------------------------------------|-------------------|-------------|------|
|                                      |                   | 8 Å         | 6 Å  |
| 3ESS                                 | 1,8-naphthalimide | 2.43        | 2.39 |
| 3NY6                                 | V30               | 7.73        | 5.60 |
| 3KI0                                 | GPD               | 3.19        | 0.69 |
| 3KI1                                 | GPF               | 11.77       | 7.15 |
| 3KI2                                 | GPG               | 1.18        | 0.31 |
| 3KI3                                 | GPH               | 2.94        | 0.94 |
| 3KI4                                 | GPP               | 0.82        | 0.72 |
| 3KI5                                 | GPM               | 4.97        | 4.81 |
| 3KI6                                 | GPL               | 5.03        | 3.02 |
| 3KI7                                 | GPI               | 3.28        | 1.04 |

**References:**

1. Jorgensen, R., Purdy, A. E., Fieldhouse, R. J., Kimber, M. S., Bartlett, D. H., and Merrill, A. R. Cholix toxin, a novel ADP-ribosylating factor from *Vibrio cholerae*. *J. Biol. Chem.*, **2008**. 283(16), 10671-10678.
2. Fieldhouse, R. J., Jorgensen, R., Lugo, M. R., and Merrill, A. R. The 1.8 Å Cholix Toxin Crystal Structure in Complex with NAD<sup>+</sup> and Evidence for a New Kinetic Model. *J. Biol. Chem.*, **2012**. 287(25), 21176-21188.
3. *Molecular Operating Environment (MOE)*. 2015, Chemical Computing Group: Montreal, Canada.
